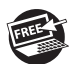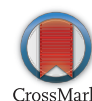

# Erratum

**Efficacy and Safety of Dulaglutide Added Onto Pioglitazone and Metformin Versus Exenatide in Type 2 Diabetes in a Randomized Controlled Trial (AWARD-1). Diabetes Care 2014;37:2159–2167**

DOI: 10.2337/dc14-er10

*Carol Wysham, Thomas Blevins,  
Richard Arakaki, Gildred Colon,  
Pedro Garcia, Charles Atisso,  
Debra Kuhstoss, and Mark Lakshmanan*

During production, an error was introduced to the legend of Figure 2. The correct *P* value is  $\#P < 0.05$  vs. exenatide rather than 0.95 as printed. We regret the error.

The online version reflects these changes.
